# Supplementary material
Source: Springer Nature journal article supplement (https://www.springermedizin.de/resource/supplementary/12967_2011_956_MOESM1_ESM.pdf/9577284)

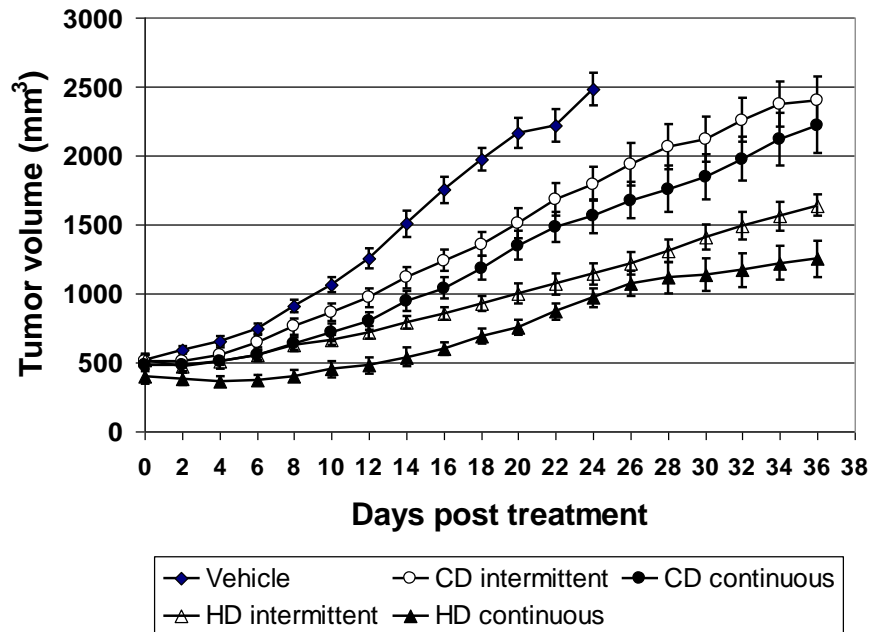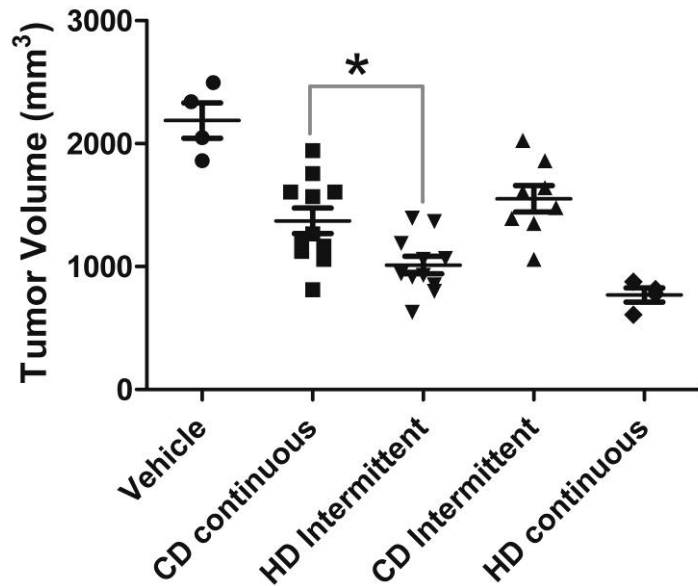

A

B

Supplement: MOESM1 [file 9577284]
